# Supplementary material
Source: publisher figshare collection journal article supplement (https://brill.figshare.com/ndownloader/files/14859836)
Supplement: Supplementary file 1 [file 14859836]

# Sexual dimorphism in *Xenodon neuwiedii* skull revealed by geometric morphometrics (Serpentes; Dipsadidae)

Roberta Azeredo Murta-Fonseca<sup>1,2,\*</sup>, Alessandra Machado<sup>3</sup>, Ricardo Tadeu Lopes<sup>3</sup>,

Daniel Silva Fernandes<sup>1,2</sup>

**Abstract.** Sexual dimorphism in snake head/skull is poorly known, although analyses in other vertebrate groups have already pointed this kind of morphological difference. Herein we evaluated the existence of sexual dimorphism in the skull of *Xenodon neuwiedii* through Geometric Morphometrics (GM). We found that females have larger skulls than males using centroid size data. Considering the ventral view of the palatamaxillary apparatus, compared to females, males tend to have longer maxilla, ectopterygoid slightly laterally shifted, palatine slightly shorter, and longer pterygoid. For the dorsal view, males showed larger snout, more oblique frontoparietal suture, posterior region of the skull more tapered, larger supraoccipital, and larger and more oblique supratemporals. *Xenodon neuwiedii* showed static allometry only for the symmetric component of the dorsal view, with 9.7% of shape variation explained by size. The present study is the first evaluating and describing sexual dimorphism in skull shape for snakes independently of size. We compared our results with other studies and concluded that to accurately perform intraspecific analyses or to better understand sexual and/or natural selection, sexual dimorphism should be considered, even for structures (e.g. skull) that are traditionally not used for this purpose.

**Keywords:** allometry, female, male, osteology, shape, snake.

1 - Departamento de Vertebrados, Museu Nacional, Universidade Federal do Rio de Janeiro, Quinta da Boa Vista, Rio de Janeiro, RJ, Brazil, CEP 20940-040

2 - Departamento de Zoologia, Instituto de Biologia, Universidade Federal do Rio de Janeiro, Ilha do Governador, Rio de Janeiro, RJ, Brazil, CEP 21941-902

3 - Instituto Alberto Luiz Coimbra de Pós-Graduação e Pesquisa em Engenharia, Laboratório de Instrumentação Nuclear, Universidade Federal do Rio de Janeiro, Rio de Janeiro, RJ, Brazil, CEP 21941-450

\*Corresponding author; e-mail: robertamfonseca@outlook.com

## **Supplementary material**

**Table S1.** Description of landmarks used in the GM analyses of the (a) dorsal and (b) ventral views of the skull of *X. neuwiedii*.

| Landmark   | Description                                             |
|------------|---------------------------------------------------------|
| a. Dorsal  |                                                         |
| 1          | Anterior-most point of premaxilla                       |
| 2,3        | Lateral-most point of premaxilla                        |
| 4          | Dorsal-most point of ascending process of premaxilla    |
| 5          | Anterior-most point of nasals joint                     |
| 6,7        | Anterior-most point of the nasals                       |
| 8,9        | Most posterolateral point of the nasals                 |
| 10         | Rearmost point of nasals joint                          |
| 11, 12     | Lateral-most point of the nasals                        |
| 13         | Anterior-most point of frontals joint                   |
| 14,16      | Anterior-most point of prefrontal-frontal joint         |
| 15, 17     | Posterior-most point of prefrontal-frontal joint        |
| 18, 19     | Lateral-most point of frontal-parietal joint            |
| 20         | Contact between frontals joint and parietal             |
| 21, 22     | Lateral-most point of postorbital process               |
| 23, 24     | Most posterolateral points of parietal                  |
| 25, 26     | Lateral-most point of the parietal-supraoccipital joint |
| 27         | Posterior-most point of parietal                        |
| 28, 29     | Supraoccipital-prootic-exoccipitals joint               |
| 30         | Posterior-most point of supraoccipital                  |
| 31, 32     | Posterior-most point of exoccipitals                    |
| 33         | Posterior-most point of exoccipitals joint              |
| 34, 36     | Anterior-most points of supratemporals                  |
| 35, 37     | Posterior-most points of supratemporals                 |
| b. Ventral |                                                         |
| 1          | Anterior-most point of maxilla                          |
| 2          | Posterior-most point of maxilla                         |

---

|    |                                                                  |
|----|------------------------------------------------------------------|
| 3  | Last maxillary tooth                                             |
| 4  | Medial-most point of the palatine process of maxilla             |
| 5  | Anterior-most point of palatine                                  |
| 6  | Lateral-most point of maxillary process of palatine              |
| 7  | Anterior-most point of the basis of choanal process of palatine  |
| 8  | Medial-most point of choanal process of palatine                 |
| 9  | Posterior-most point of the basis of choanal process of palatine |
| 10 | Lateral-most point of the palatine-pterygoid joint               |
| 11 | Medial-most point of palatine-pterygoid joint                    |
| 12 | Anterior-most point of ectopterygoid-pterygoid joint             |
| 13 | Posterior-most point of ectopterygoid-pterygoid joint            |
| 14 | Posterior-most point of pterygoid                                |
| 15 | Last pterygoid tooth                                             |
| 16 | First pterygoid tooth                                            |
| 17 | Anterior-most point of the medial branch of ectopterygoid        |
| 18 | Anterior-most point of the lateral branch of ectopterygoid       |

---

**Table S2.** Sum of squares (SS), mean squares (MS), degree of freedom (DF), F statistics, and P-value calculated using ANOVA considering the difference of Procrustes coordinates between two photographs of the same individuals and two landmark digitalisations of the same photograph, for dorsal (D) and ventral (V) views of *X. newwiedii* skull.

| Effect         | SS         | MS           | DF   | F     | P (param.) |
|----------------|------------|--------------|------|-------|------------|
| Individual (D) | 0.21213729 | 0.0001554119 | 1365 | 10.23 | <.0001     |
| Side (D)       | 0.00171671 | 0.0000490488 | 35   | 3.23  | <.0001     |
| Ind*Side (D)   | 0.02074168 | 0.0000151954 | 1365 | 6.36  | <.0001     |
| Photograph (D) | 0.00669125 | 0.0000023897 | 2800 | 3.13  | <.0001     |
| Landmark (D)   | 0.00428167 | 0.000000764  | 5600 |       |            |
| Individual (V) | 0.59360899 | 0.0004756482 | 1248 | 24.54 | <.0001     |
| Photograph (V) | 0.02480486 | 0.0000193788 | 1280 | 3.63  | <.0001     |
| Landmark (V)   | 0.01365490 | 0.0000053339 | 2560 |       |            |

**Supplementary Table 3.** Sum of squares (SS), mean squares (MS), degrees of freedom (DF), F statistics, R squared coefficient (RSQ), and P-value of MANOVA considering centroid size, sex, and the interaction between these parameters for the dorsal view of *X. neuwiedii* skull.

|              | DF | SS       | MS        | RSQ     | F      | P     |
|--------------|----|----------|-----------|---------|--------|-------|
| CENTROID     | 1  | 0.002571 | 0.0025710 | 0.04398 | 1.9381 | 0.050 |
| SEX          | 1  | 0.006209 | 0.0062086 | 0.10621 | 4.6804 | 0.001 |
| CENTROID:SEX | 1  | 0.001921 | 0.0019215 | 0.03287 | 1.4485 | 0.075 |
| Residuals    | 36 | 0.047754 | 0.0013265 | 0.81694 |        |       |
| Total        | 39 | 0.058455 |           |         |        |       |

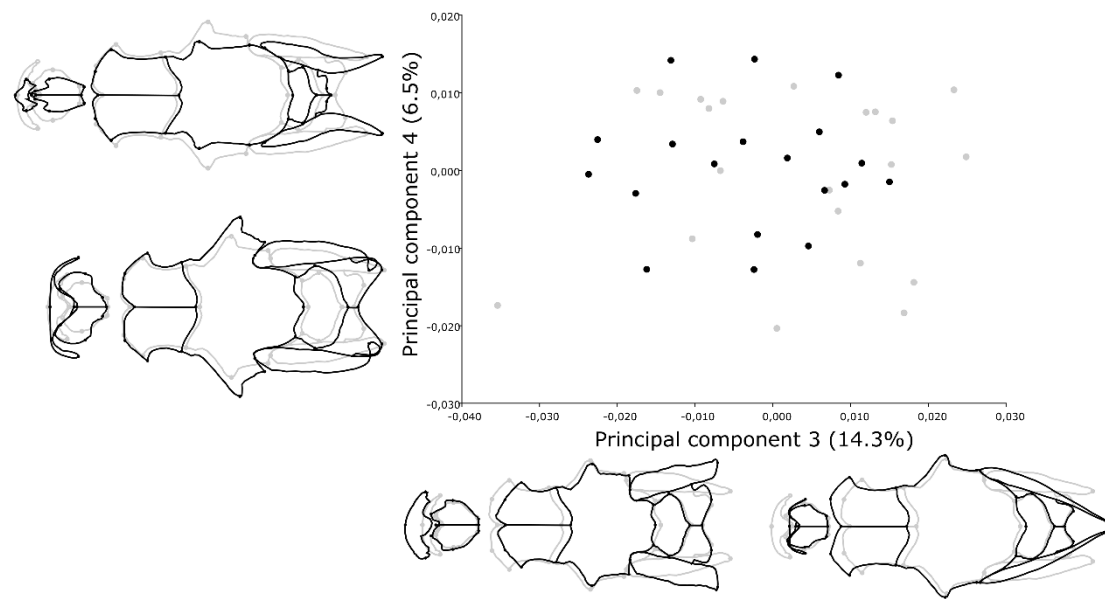

**Figure S1.** Principal component analysis of symmetric component of the dorsal view of the overall shape of the skull of *Xenodon neuwiedii*. Shapes represent, respectively in anticlockwise, PC4 in 0.1, PC4 in -0.1, PC3 in -0.1 and PC3 in 0.1. Grey dots females; black dots males.

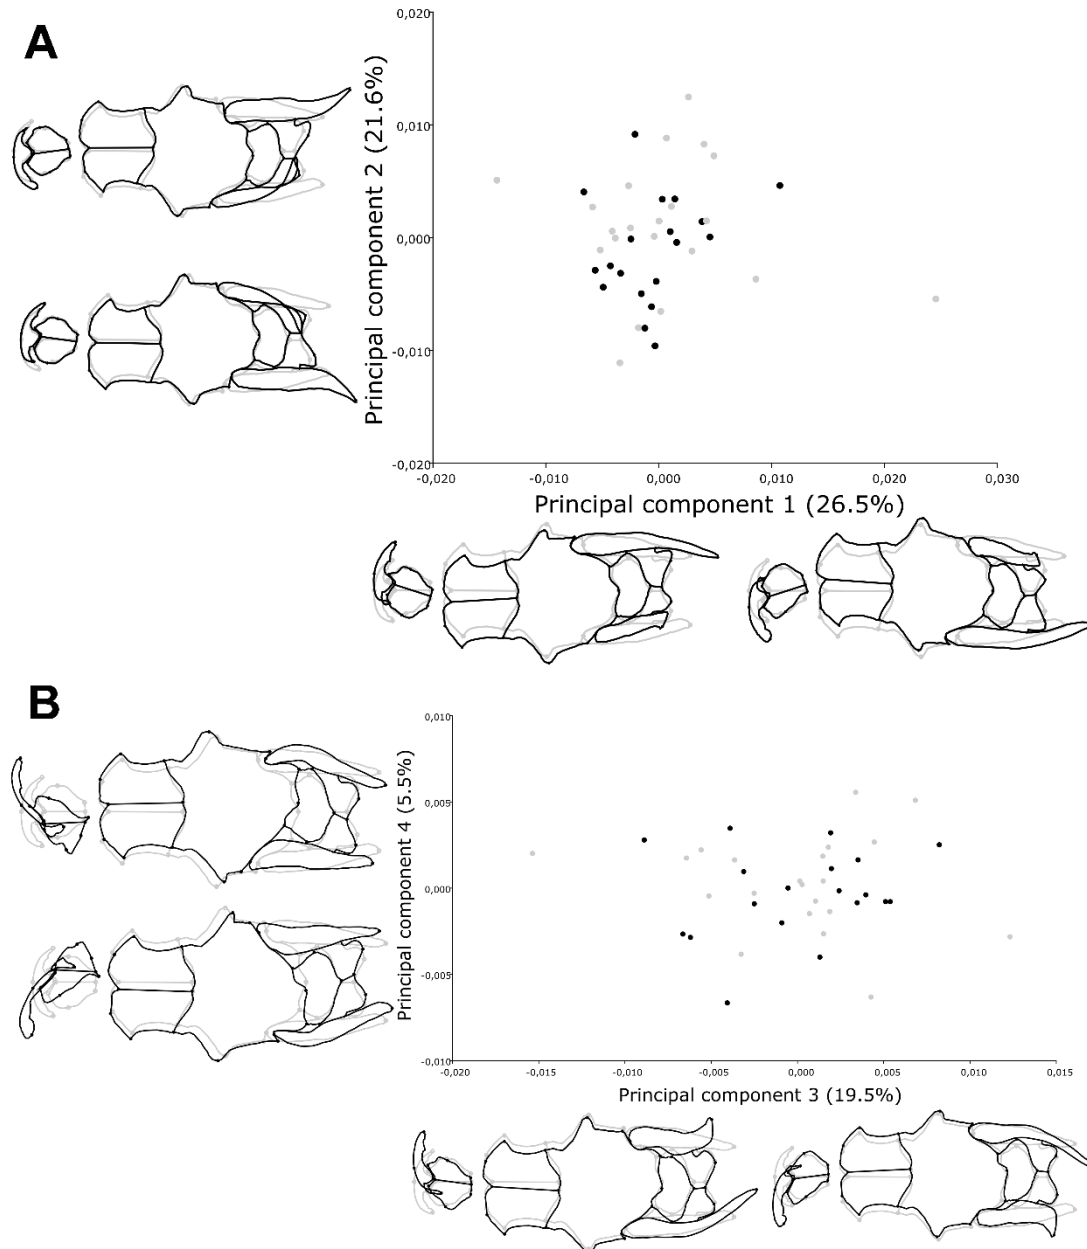

**Figure S2.** Principal component analysis of asymmetric component of the dorsal view of the overall shape of the skull of *Xenodon neuwiedii*. A – (P1 vs. PC2) Shapes represent, respectively in anticlockwise, PC2 in 0.1, PC2 in -0.1, PC1 in -0.1 and PC1 in 0.1. B – (PC3 vs. PC4) Shapes represent, respectively in anticlockwise, PC4 in 0.1, PC4 in -0.1, PC3 in -0.1 and PC3 in 0.1. Grey dots females; black dots males.

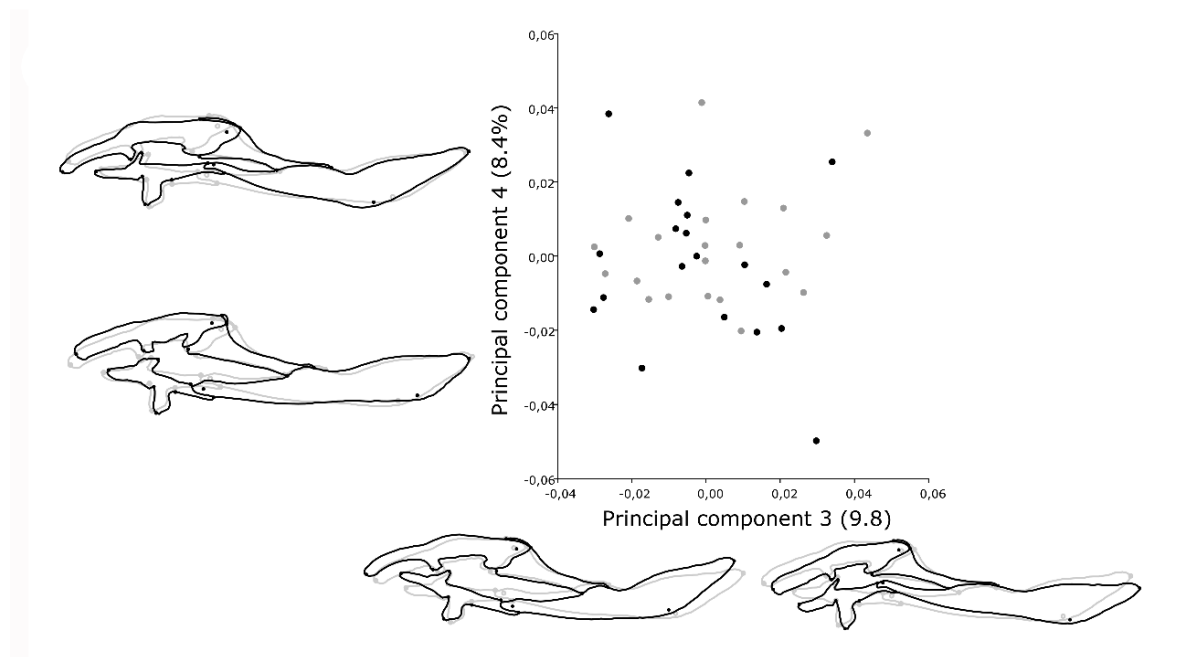

**Figure S3.** Principal component analysis of the ventral view of the overall shape of the skull of *Xenodon neuwiedii*. Shapes represent, respectively in anticlockwise, PC4 in 0.1, PC4 in -0.1, PC3 in -0.1 and PC3 in 0.1. Grey dots females; black dots males.

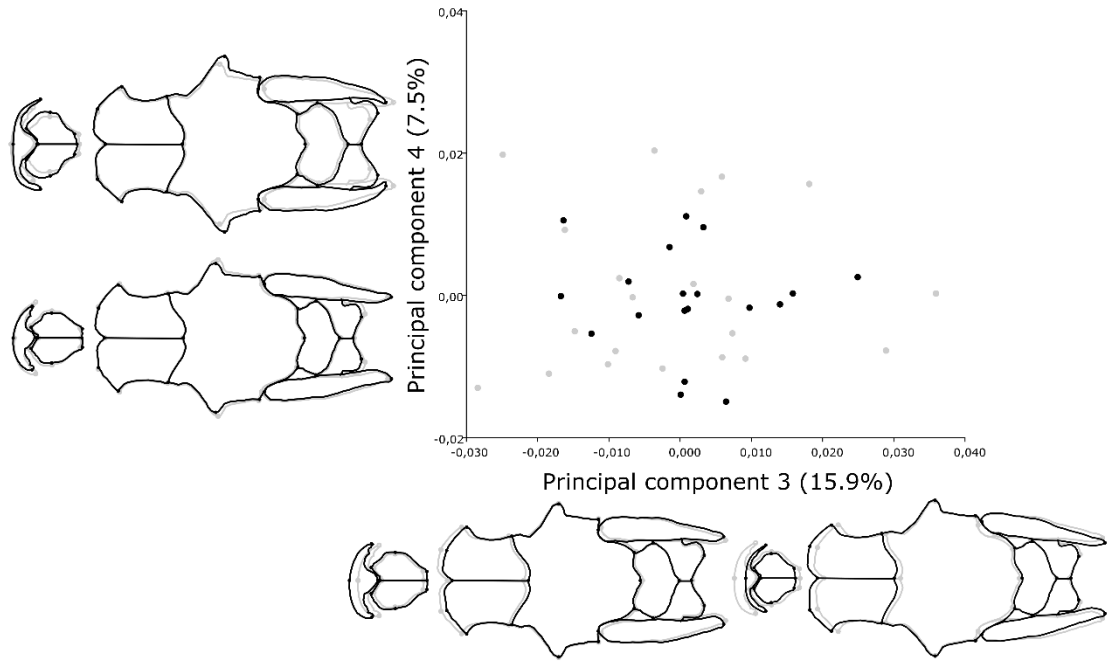

**Figure S4.** Principal component analysis of size corrected symmetric component of dorsal view of the skull of *Xenodon neuwiedii*. Shapes represent, respectively in anticlockwise, PC4 in 0.04, PC4 in -0.02, PC3 in -0.03 and PC3 in 0.04. Grey dots females; black dots males.
